# Supplementary material for: Deep IDA: A Deep Learning Method for Integrative Discriminant Analysis of Multi-View Data with Feature Ranking–An Application to COVID-19 severity
Source: PubMed Central journal article supplement (PMC8609900), 2021-11-18
Supplement: NIHPP2111.09964V1-supplement-1.pdf [file NIHPP2111.09964V1-supplement-1.pdf]

# Supplementary Material for “Deep IDA: A Deep Learning Method for Integrative Discriminant Analysis of Multi-View Data with Feature Ranking—An Application to COVID-19 severity”

Jiuzhou Wang, Sandra E. Safo  
Division of Biostatistics  
University of Minnesota, MN

## 1 Theorems and Proofs

**Theorem 1.** Let  $\mathbf{S}_t^d$  and  $\mathbf{S}_b^d$  respectively be the total covariance and the between-class covariance for the top-level representations  $\mathbf{H}^d, d = 1, \dots, D$ . Let  $\mathbf{S}_{dj}$  be the cross-covariance between top-level representations  $d$  and  $j$ . Assume  $\mathbf{S}_t^d \succ 0$ . Define  $\mathcal{M}^d = \mathbf{S}_t^{d-\frac{1}{2}} \mathbf{S}_b^d \mathbf{S}_t^{d-\frac{1}{2}}$  and  $\mathcal{N}_{dj} = \mathbf{S}_t^{d-\frac{1}{2}} \mathbf{S}_{dj} \mathbf{S}_t^{j-\frac{1}{2}}$ . Then  $\mathbf{\Gamma}^d \in \mathbb{R}^{o_d \times l}$ ,  $l \leq \min\{K-1, o_1, \dots, o_D\}$  in equation (4) of main text are eigenvectors corresponding respectively to eigenvalues  $\mathbf{\Lambda}_d = \text{diag}(\lambda_{d_1}, \dots, \lambda_{d_l})$ ,  $\lambda_{d_1} > \dots > \lambda_{d_l} > 0$  that iteratively solve the eigensystem problems:

$$\left( c_1 \mathcal{M}^d + c_2 \sum_{j \neq d}^D \mathcal{N}_{dj} \mathbf{\Gamma}_j \mathbf{\Gamma}_j^T \mathcal{N}_{dj}^T \right) \mathbf{\Gamma}_d = \mathbf{\Lambda}_d \mathbf{\Gamma}_d, \forall d = 1, \dots, D$$

where  $c_1 = \frac{\rho}{D}$  and  $c_2 = \frac{2(1-\rho)}{D(D-1)}$ .

**Prove.** Solving the optimization problem is equivalent to iteratively solving the following generalized eigenvalue systems:

$$\begin{aligned} \left( c_1 \mathcal{M}^1 + c_2 \sum_{j=2}^D \mathcal{N}_{1j} \mathbf{\Gamma}_j \mathbf{\Gamma}_j^T \mathcal{N}_{1j}^T \right) \mathbf{\Gamma}_1 &= \mathbf{\Lambda}_1 \mathbf{\Gamma}_1 \\ &\vdots \\ \left( c_1 \mathcal{M}^d + c_2 \sum_{j=1, j \neq d}^D \mathcal{N}_{dj} \mathbf{\Gamma}_j \mathbf{\Gamma}_j^T \mathcal{N}_{dj}^T \right) \mathbf{\Gamma}_d &= \mathbf{\Lambda}_d \mathbf{\Gamma}_d \\ &\vdots \\ \left( c_1 \mathcal{M}^D + c_2 \sum_{j=1}^{D-1} \mathcal{N}_{Dj} \mathbf{\Gamma}_j \mathbf{\Gamma}_j^T \mathcal{N}_{Dj}^T \right) \mathbf{\Gamma}_D &= \mathbf{\Lambda}_D \mathbf{\Gamma}_D \end{aligned}$$

where  $c_1 = \frac{\rho}{D}$  and  $c_2 = \frac{2(1-\rho)}{D(D-1)}$ .

*Proof.* The Lagrangian is

$$\begin{aligned} L(\mathbf{\Gamma}_1, \dots, \mathbf{\Gamma}_D, \lambda_1, \dots, \lambda_D) &= \rho \frac{1}{D} \sum_{d=1}^D \text{tr}[\mathbf{\Gamma}_d^T \mathcal{M}^d \mathbf{\Gamma}_d] + (1-\rho) \frac{2}{D(D-1)} \sum_{d=1}^D \sum_{j, j \neq d}^D \text{tr}[\mathbf{\Gamma}_d^T \mathcal{N}_{dj} \mathbf{\Gamma}_j \mathbf{\Gamma}_j^T \mathcal{N}_{dj}^T \mathbf{\Gamma}_d] - \sum_{d=1}^D \eta_d (\text{tr}[\mathbf{\Gamma}_d^T \mathbf{\Gamma}_d] - l) \\ &= c_1 \sum_{d=1}^D \text{tr}[\mathbf{\Gamma}_d^T \mathcal{M}^d \mathbf{\Gamma}_d] + c_2 \sum_{d=1}^D \sum_{j, j \neq d}^D \text{tr}[\mathbf{\Gamma}_d^T \mathcal{N}_{dj} \mathbf{\Gamma}_j \mathbf{\Gamma}_j^T \mathcal{N}_{dj}^T \mathbf{\Gamma}_d] - \sum_{d=1}^D \lambda_d (\text{tr}[\mathbf{\Gamma}_d^T \mathbf{\Gamma}_d] - l) \end{aligned} \quad (1)$$

The first order stationary solution for  $\mathbf{\Gamma}_d (\forall d = 1, \dots, D)$  is

$$\frac{\partial L(\mathbf{\Gamma}_1, \dots, \mathbf{\Gamma}_D, \lambda_1, \dots, \lambda_D)}{\partial \mathbf{\Gamma}_d^T} = 2c_1 \mathcal{M}^d \mathbf{\Gamma}_d + 2c_2 \sum_{j, j \neq d}^D (\mathcal{N}_{dj} \mathbf{\Gamma}_j \mathbf{\Gamma}_j^T \mathcal{N}_{dj}^T) \mathbf{\Gamma}_d - 2\lambda_d \mathbf{\Gamma}_d = \mathbf{0} \quad (2)$$

Rearranging the equation 2 we have

$$\left( c_1 \mathcal{M}^d + c_2 \sum_{j,j \neq d}^D \mathcal{N}_{dj} \mathbf{\Gamma}_j \mathbf{\Gamma}_j^T \mathcal{N}_{dj}^T \right) \mathbf{\Gamma}_d = \lambda_d \mathbf{\Gamma}_d$$

For  $\mathbf{\Gamma}_j, \forall j \neq d$  fixed, the above can be solved for the eigenvalues of  $(c_1 \mathcal{M}^d + c_2 \sum_{j,j \neq d}^D \mathcal{N}_{dj} \mathbf{\Gamma}_j \mathbf{\Gamma}_j^T \mathcal{N}_{dj}^T)$ . Arrange the eigenvalues from large to small and denote  $\mathbf{\Lambda}_d \in \mathbf{R}^{o_d \times o_d}$  as the diagonal matrix of those values. For the top  $l$  largest eigenvalues, denote the corresponding eigenvectors as  $\tilde{\mathbf{\Gamma}}_d = [\gamma_{d,1}, \dots, \gamma_{d,l}]$ . Therefore, starting from  $d = 1$ , following this process,  $\tilde{\mathbf{\Gamma}}_1$  is updated; then, update  $\tilde{\mathbf{\Gamma}}_2$  and so on; finally, update  $\tilde{\mathbf{\Gamma}}_D$ . We iterate until convergence, which is defined as,  $\frac{\|\tilde{\mathbf{\Gamma}}_{d,new} - \tilde{\mathbf{\Gamma}}_{d,old}\|_F^2}{\|\tilde{\mathbf{\Gamma}}_{d,old}\|_F^2} < \epsilon$ . When convergence is achieved, set  $\tilde{\mathbf{\Gamma}}_d = \hat{\mathbf{\Gamma}}_d, \forall d = 1, \dots, D$ . ■

**Theorem 2.** For  $d$  fixed, let  $\eta_{d,1}, \dots, \eta_{d,l}, l \leq \min\{K-1, o_1, \dots, o_D\}$  be the largest  $l$  eigenvalues of  $c_1 \mathcal{M}^d + c_2 \sum_{j,j \neq d}^D \mathcal{N}_{dj} \mathbf{\Gamma}_j \mathbf{\Gamma}_j^T \mathcal{N}_{dj}^T$ . Then the solution  $\tilde{f}^d$  to the optimization problem in equation (5) [main text] for view  $d$  maximizes

$$\sum_{r=1}^l \eta_{d,r}. \tag{3}$$

**Proof.** Fix  $d$  and let  $\eta_{d,1}, \eta_{d,2}, \dots, \eta_{d,l}$  be the top  $l$  eigenvalues of

$$c_1 \mathcal{M}^d + c_2 \sum_{j,j \neq d}^D \mathcal{N}_{dj} \tilde{\mathbf{\Gamma}}_j \tilde{\mathbf{\Gamma}}_j^T \mathcal{N}_{dj}^T.$$

Then,

$$\sum_{r=1}^l \eta_{d,r} = c_1 \text{tr}[\tilde{\mathbf{\Gamma}}_d^T \mathcal{M}^d \tilde{\mathbf{\Gamma}}_d] + c_2 \sum_{j,j \neq d}^D \text{tr}[\tilde{\mathbf{\Gamma}}_d^T \mathcal{N}_{dj} \tilde{\mathbf{\Gamma}}_j \tilde{\mathbf{\Gamma}}_j^T \mathcal{N}_{dj}^T \tilde{\mathbf{\Gamma}}_d]$$

*Proof.*

$$\begin{aligned} & c_1 \text{tr}[\tilde{\mathbf{\Gamma}}_d^T \mathcal{M}^d \tilde{\mathbf{\Gamma}}_d] + c_2 \sum_{j,j \neq d}^D \text{tr}[\tilde{\mathbf{\Gamma}}_d^T \mathcal{N}_{dj} \tilde{\mathbf{\Gamma}}_j \tilde{\mathbf{\Gamma}}_j^T \mathcal{N}_{dj}^T \tilde{\mathbf{\Gamma}}_d] \\ &= \text{tr}(\tilde{\mathbf{\Gamma}}_d^T (c_1 \mathcal{M}^d + c_2 \sum_{j,j \neq d}^D \mathcal{N}_{dj} \tilde{\mathbf{\Gamma}}_j \tilde{\mathbf{\Gamma}}_j^T \mathcal{N}_{dj}^T) \tilde{\mathbf{\Gamma}}_d) \\ &= \text{tr}(\tilde{\mathbf{\Gamma}}_d^T \mathbf{\Lambda}_d \tilde{\mathbf{\Gamma}}_d) \\ &= \sum_{r=1}^l \eta_{d,r} \end{aligned}$$
■

## 2 More Results From Real Data Analysis

### 2.1 Data preprocessing and application of Deep IDA and competing methods

Of the 128 patients, 125 had both omics and clinical data. We focused on proteomics, RNA-seq, and metabolomics data in our analyses since many lipids were not annotated. We formed a four-class classification problem using COVID-19 and ICU status. Our four groups were: with COVID-19 and not admitted to the ICU (COVID Non-ICU), with COVID-19 and admitted to the ICU (COVID ICU), no COVID-19 and admitted to the ICU (Non-COVID ICU), and no COVID-19 and not admitted to the ICU (Non-COVID Non-ICU). The frequency distribution of samples in these four groups were: 40% COVID ICU, 40% COVID Non-ICU, 8% Non-COVID Non-ICU, and 12% Non-COVID ICU. The initial dataset contains 18,212 genes, 517 proteins, and 111 metabolomics features. Prior to applying our method, we pre-processed the data as follows. All genes which were missing in our samples were removed from the dataset and 15,106 genes remained. We selected genes that more than half of their variables are non-zero, and we applied box-cox transformation on each gene as the gene data were highly

skewed. The transformed data were standardized to have mean zero and variance one. We kept genes with variance less than the 25th percentile. We then used ANOVA on the standardized data to filter out (p-values > 0.05) genes with low potential to discriminate among the four groups. For the proteomics and metabolomics data, we standardized each molecule to have mean zero and variance one, pre-screened with ANOVA and filtered out molecules with p-values > 0.05. Our final data were  $\mathbf{X}^1 \in \mathbb{R}^{125 \times 2,734}$  for the gene data,  $\mathbf{X}^2 \in \mathbb{R}^{125 \times 269}$  for the proteomics data, and  $\mathbf{X}^3 \in \mathbb{R}^{125 \times 66}$  for the metabolomics data.

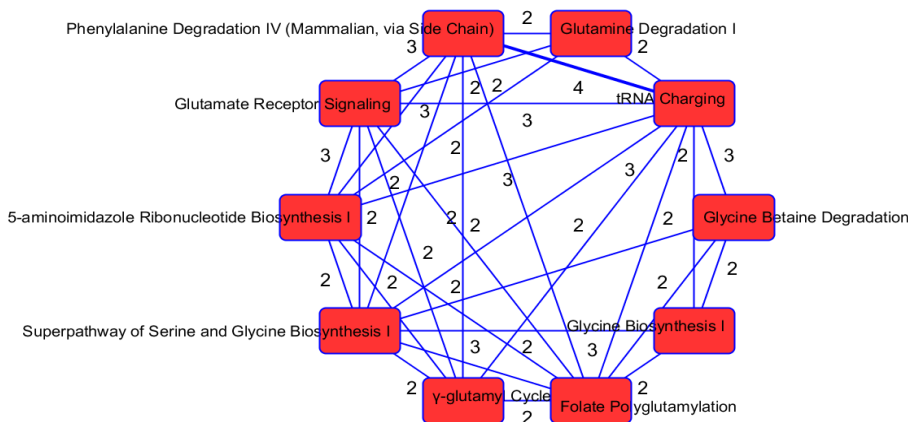

Figure 1: Network of overlapping canonical pathways from highly ranked metabolites. Nodes refer to pathways and a line connects any two pathways when there is at least two molecules in common between them.

Table 1: Top Diseases and Biological Functions from Ingenuity Pathway Analysis (IPA).

|                | Top Diseases and Bio Functions                                                                          | P-value range       | Molecules Selected |
|----------------|---------------------------------------------------------------------------------------------------------|---------------------|--------------------|
| RNA Sequencing | Cancer (such as non-melanoma solid tumor, head and neck tumor)                                          | 4.96E-02 – 2.74E-05 | 48                 |
|                | Organismal Injury and Abnormalities                                                                     | 4.96E-02 – 2.74E-05 | 48                 |
|                | Neurological Disease (such as glioma cancer, brain lesion, neurological deficiency)                     | 4.86E-02 – 5.84E-05 | 36                 |
|                | Developmental Disorder (such as intellectual disability with ataxia)                                    | 4.46E-02 – 3.76E-05 | 16                 |
|                | Hereditary Disorder (such as familial midline effect)                                                   | 4.86E-02 – 2.02E-05 | 16                 |
| Proteomics     | Infectious Diseases (such as Severe COVID-19, COVID-19, infection by SARS coronavirus)                  | 1.75E-03 – 8.31E-13 | 19                 |
|                | Inflammatory Response (such as inflammation of organ, degranulation of blood platelets)                 | 1.29E-03 – 1.34E-12 | 32                 |
|                | Metabolic Disease (such as amyloidosis, Alzheimer disease, diabetes mellitus)                           | 1.47E-03 – 2.48E-12 | 20                 |
|                | Organismal Injury and Abnormalities (such as amyloidosis, tauopathy)                                    | 1.72E-03 – 2.48E-12 | 39                 |
|                | Neurological Disease (such as tauopathy, progressive encephalopathy, progressive neurological disorder) | 1.57E-03 – 3.41E-11 | 34                 |
| Metabolomics   | Cancer                                                                                                  | 3.63E-02 – 5.20E-14 | 18                 |
|                | Gastrointestinal Disease (such as digestive system cancer, hepatocellular carcinoma)                    | 3.64E-02 – 5.20E-14 | 20                 |
|                | Organismal Injury and Abnormalities (such as digestive system cancer, abdominal cancer)                 | 3.79E-02 – 5.20E-14 | 22                 |
|                | Hepatic System Disease (such as hepatocellular carcinoma, liver lesion)                                 | 2.91E-02 – 1.66E-11 | 15                 |
|                | Developmental Disorder (such as mucopolysaccharidosis type I, spina bifida)                             | 2.44E-02 – 1.83E-09 | 11                 |

Table 2: Top Molecular and Cellular Functions from Ingenuity Pathway Analysis (IPA).

|                | Molecular and Cellular Functions       | P-value range       | Molecules Selected |
|----------------|----------------------------------------|---------------------|--------------------|
| RNA Sequencing | Cell Death and Survival                | 4.46E-02 – 2.00E-03 | 8                  |
|                | Amino Acid Metabolism                  | 3.47E-02 – 2.07E-05 | 2                  |
|                | Cell-to-cell Signaling and Interaction | 4.86E-02 – 2.07E-03 | 10                 |
|                | Cellular Assembly and Organization     | 4.46E-02 – 2.07E-03 | 9                  |
|                | Cellular Function and Maintenance      | 4.86E-02 – 2.07E-03 | 10                 |
| Proteomics     | Cellular Compromise                    | 1.29E-03 – 1.34E-12 | 13                 |
|                | Cellular Movement                      | 1.65E-03 – 2.19E-09 | 24                 |
|                | Lipid Metabolism                       | 1.28E-03 – 2.95E-09 | 15                 |
|                | Molecular Transport                    | 1.28E-03 – 2.95E-09 | 15                 |
|                | Small molecule Biochemistry            | 1.61E-03 – 2.95E-09 | 19                 |
| Metabolomics   | Amino Acid Metabolism                  | 3.64E-02 – 3.99E-08 | 9                  |
|                | Molecular Transport                    | 3.82E-02 – 3.99E-08 | 17                 |
|                | Small Molecule Biochemistry            | 3.64E-02 – 3.99E-08 | 18                 |
|                | Cellular Growth and Proliferation      | 3.79E-02 – 5.12E-08 | 16                 |
|                | Cell Cycle                             | 3.63E-02 – 5.81E-07 | 10                 |

Table 3: **Linear Simulations** Network structures for all deep learning based methods. In order to make fair comparisons, for each dataset, the network structure for Deep CCA/Deep GCCA is the same as the proposed Deep IDA method. The activation function is Leaky Relu with parameter 0.1 by default. After activation, batch normalization is also implemented. – indicates not applicable

| Data      | Sample size<br>(Train,Valid,Test) | Feature size<br>( $p^1, p^2, p^3$ ) | Method                | Network structure   | Epochs<br>per run | Batch<br>size |
|-----------|-----------------------------------|-------------------------------------|-----------------------|---------------------|-------------------|---------------|
| Setting 1 | 540,540,1080                      | 1000,1000,-                         | Deep IDA (+Bootstrap) | Input-512-256-64-10 | 50                | 540           |
| Setting 1 | 540,540,1080                      | 1000,1000,-                         | Deep CCA              | Input-512-256-64-10 | 50                | 180           |
| Setting 2 | 540,540,1080                      | 1000,1000,1000                      | Deep IDA (+Bootstrap) | Input-512-256-20    | 50                | 540           |
| Setting 2 | 540,540,1080                      | 1000,1000,1000                      | Deep GCCA             | Input-512-256-64-20 | 200               | 540           |

Table 4: **Nonlinear Simulations** Network structures for all deep learning based methods. In order to make fair comparisons, for each dataset, the network structure for Deep CCA/Deep GCCA is the same as the proposed Deep IDA method. The activation function is Leaky Relu with parameter 0.1 by default. After activation, batch normalization is also implemented.

| Data       | Sample size<br>(Train,Valid,Test) | Feature size<br>( $p^1, p^2, p^3$ ) | Method                | Network structure                       | Epochs<br>per run | Batch<br>size |
|------------|-----------------------------------|-------------------------------------|-----------------------|-----------------------------------------|-------------------|---------------|
| Setting 1  | 350,350,350                       | 500,500                             | Deep IDA (+Bootstrap) | Input-256*10-64-20                      | 50                | 350           |
| Setting 1  | 350,350,350                       | 500,500                             | Deep CCA              | Input-256*10-64-20                      | 50                | 350           |
| Setting 3b | 5250,5250,5250                    | 500,500                             | Deep IDA (+Bootstrap) | Input-256-256-256-256-256-256-64-20     | 50                | 500           |
| Setting 3b | 5250,5250,5250                    | 500,500                             | Deep CCA              | Input-256-256-256-256-256-256-64-20     | 50                | 500           |
| Setting 4  | 350,350,350                       | 2000,2000                           | Deep IDA (+Bootstrap) | input-256-256-256-256-256-256-256-64-20 | 50                | 350           |
| Setting 4  | 350,350,350                       | 2000,2000                           | Deep CCA              | input-256-256-256-256-256-256-256-64-20 | 50                | 350           |
| Setting 5b | 5250,5250,5250                    | 2000,2000                           | Deep IDA (+Bootstrap) | Input-256-256-256-256-256-256-64-20     | 50                | 500           |
| Setting 5b | 5250,5250,5250                    | 2000,2000                           | Deep CCA              | Input-256-256-256-256-256-256-64-20     | 50                | 500           |

Table 5: **Real Data Analysis** Network structures for all deep learning based methods. In order to make fair comparisons, for each dataset, the network structure for Deep CCA/Deep GCCA is the same as the proposed Deep IDA method. The activation function is Leaky Relu with parameter 0.1 by default. After activation, batch normalization is also implemented. For Covid-19 data, we select the top 50 features for each view from Bootstrap Deep IDA with input-512-20. – indicates not applicable

| Data           | Sample size<br>(Train,Valid,Test) | Feature size<br>( $p^1, p^2, p^3$ ) | Method                                          | Network structure   | Epochs<br>per run | Batch<br>size |
|----------------|-----------------------------------|-------------------------------------|-------------------------------------------------|---------------------|-------------------|---------------|
| Noisy<br>MNIST | 50000,10000,<br>10000             | 784,784,-                           | Deep CCA<br>non-Bootstrap Deep IDA              | Input-512-256-64-20 | 50                | 50000         |
| Covid-19       | 74,0,21                           | 2734,269,66                         | non-Bootstrap Deep IDA                          | Input-512-20        | 20                | 74            |
| Covid-19       | 74,0,21                           | 2734,269,66                         | Deep IDA on selected<br>top 50 features         | Input-512-256-20    | 20                | 74            |
| Covid-19       | 74,0,21                           | 2734,269,66                         | Deep IDA on selected<br>top 10 percent features | Input-256-64-20     | 20                | 74            |
| Covid-19       | 74,0,21                           | 2734,269,66                         | Deep GCCA on<br>selected top 50 features        | Input-256-20        | 150               | 74            |
